## Risk factors for progression of paroxysmal to persistent atrial fibrillation following successful PV isolation

S. Mohanty, C. Trivedi, D.G. Della Rocca, C. Gianni, A. Salwan, B. Macdonald, A. Mayedo, M. Bassiouny, G.J. Gallingshouse, J.D. Burkhardt, R. Horton, A. Al-Ahmad, L.D. Di Biase, A. Natale

*St. David's Medical Center, Texas Cardiac Arrhythmia Institute, Austin, United States of America*

**Funding Acknowledgement:** Type of funding source: None

**Background:** Progression from paroxysmal (PAF) to persistent atrial fibrillation (PerAF) following effective PV isolation (PVI) has important clinical implications, as it is relevant for subsequent management of the arrhythmia.

**Objective:** We evaluated risk factors responsible for progression of PAF to PerAF following successful PVI.

**Methods:** Consecutive AF patients that received their first catheter ablation as well as the first redo at our center were identified (n=1352). Patients were included in group 1 if the diagnosis was PAF at both first and redo procedure (PAF to PAF) and group 2 if PAF at index progressed to PerAF at redo. All patients received PVI plus isolation of LA posterior wall and SVC at the first procedure.

**Results:** A total of 822 patients remained as PAF at redo, whereas 530 (39%) progressed from PAF to PerAF. Clinical characteristics of the study population are presented in table 1. In multivariate analysis, BMI (OR 1.02, 1.01–1.04, p=0.04), hypertension (1.4, 1.08–1.8, p=0.01), heart failure (1.67, 1.03–2.69, p=0.03), LA size (2.75, 2.29–3.31, p<0.001) were independent predictors of progression of PAF to PerAF. Data on serum-transthyretin level was available for 37 and 48 patients in group 1 and 2 respectively. It was <18 mg/dL (normal) in 33 (68.7%) patients in group 2 vs 6 (16.2%) in group 1 (p<0.001).

**Conclusion:** In our patients, after successful PVI, progression of PAF to PerAF was mediated by independent risk factors such as high BMI, heart failure, hypertension, larger LA size and lower LVEF.

Table 1

|                      | Paroxysmal to Paroxysmal (N=822) | Paroxysmal to Persistent AF (N=530) | p-value |
|----------------------|----------------------------------|-------------------------------------|---------|
| Age                  | 62.8±11.5                        | 64.0±9.6                            | 0.04    |
| Male                 | 470 (57.2)                       | 320 (60.4)                          | 0.24    |
| BMI                  | 29.1±7.1                         | 30.1±6.1                            | 0.007   |
| Hypertension         | 408 (49.6)                       | 312 (58.9)                          | <0.001  |
| Diabetes             | 99 (12.0)                        | 77 (14.5)                           | 0.18    |
| Dyslipidemia         | 304 (37.0)                       | 227 (42.8)                          | 0.03    |
| OSA                  | 90 (10.9)                        | 62 (11.7)                           | 0.67    |
| Heart failure        | 38 (4.6)                         | 49 (9.2)                            | <0.001  |
| CAD                  | 112 (13.6)                       | 80 (15.1)                           | 0.46    |
| LA diameter          | 4.0±0.6                          | 4.5±0.7                             | <0.001  |
| LV ejection fraction | 59.2±8.0                         | 57.0±8.8                            | <0.001  |
| TIA or Stroke        | 48 (5.8)                         | 45 (8.5)                            | 0.06    |
